# Supplementary material
Source: PubMed Central journal article supplement (PMC11072765)
Supplement: 18_2022_4349_MOESM2_ESM.pdf [file 18_2022_4349_MOESM2_ESM.pdf]

**Figure S1**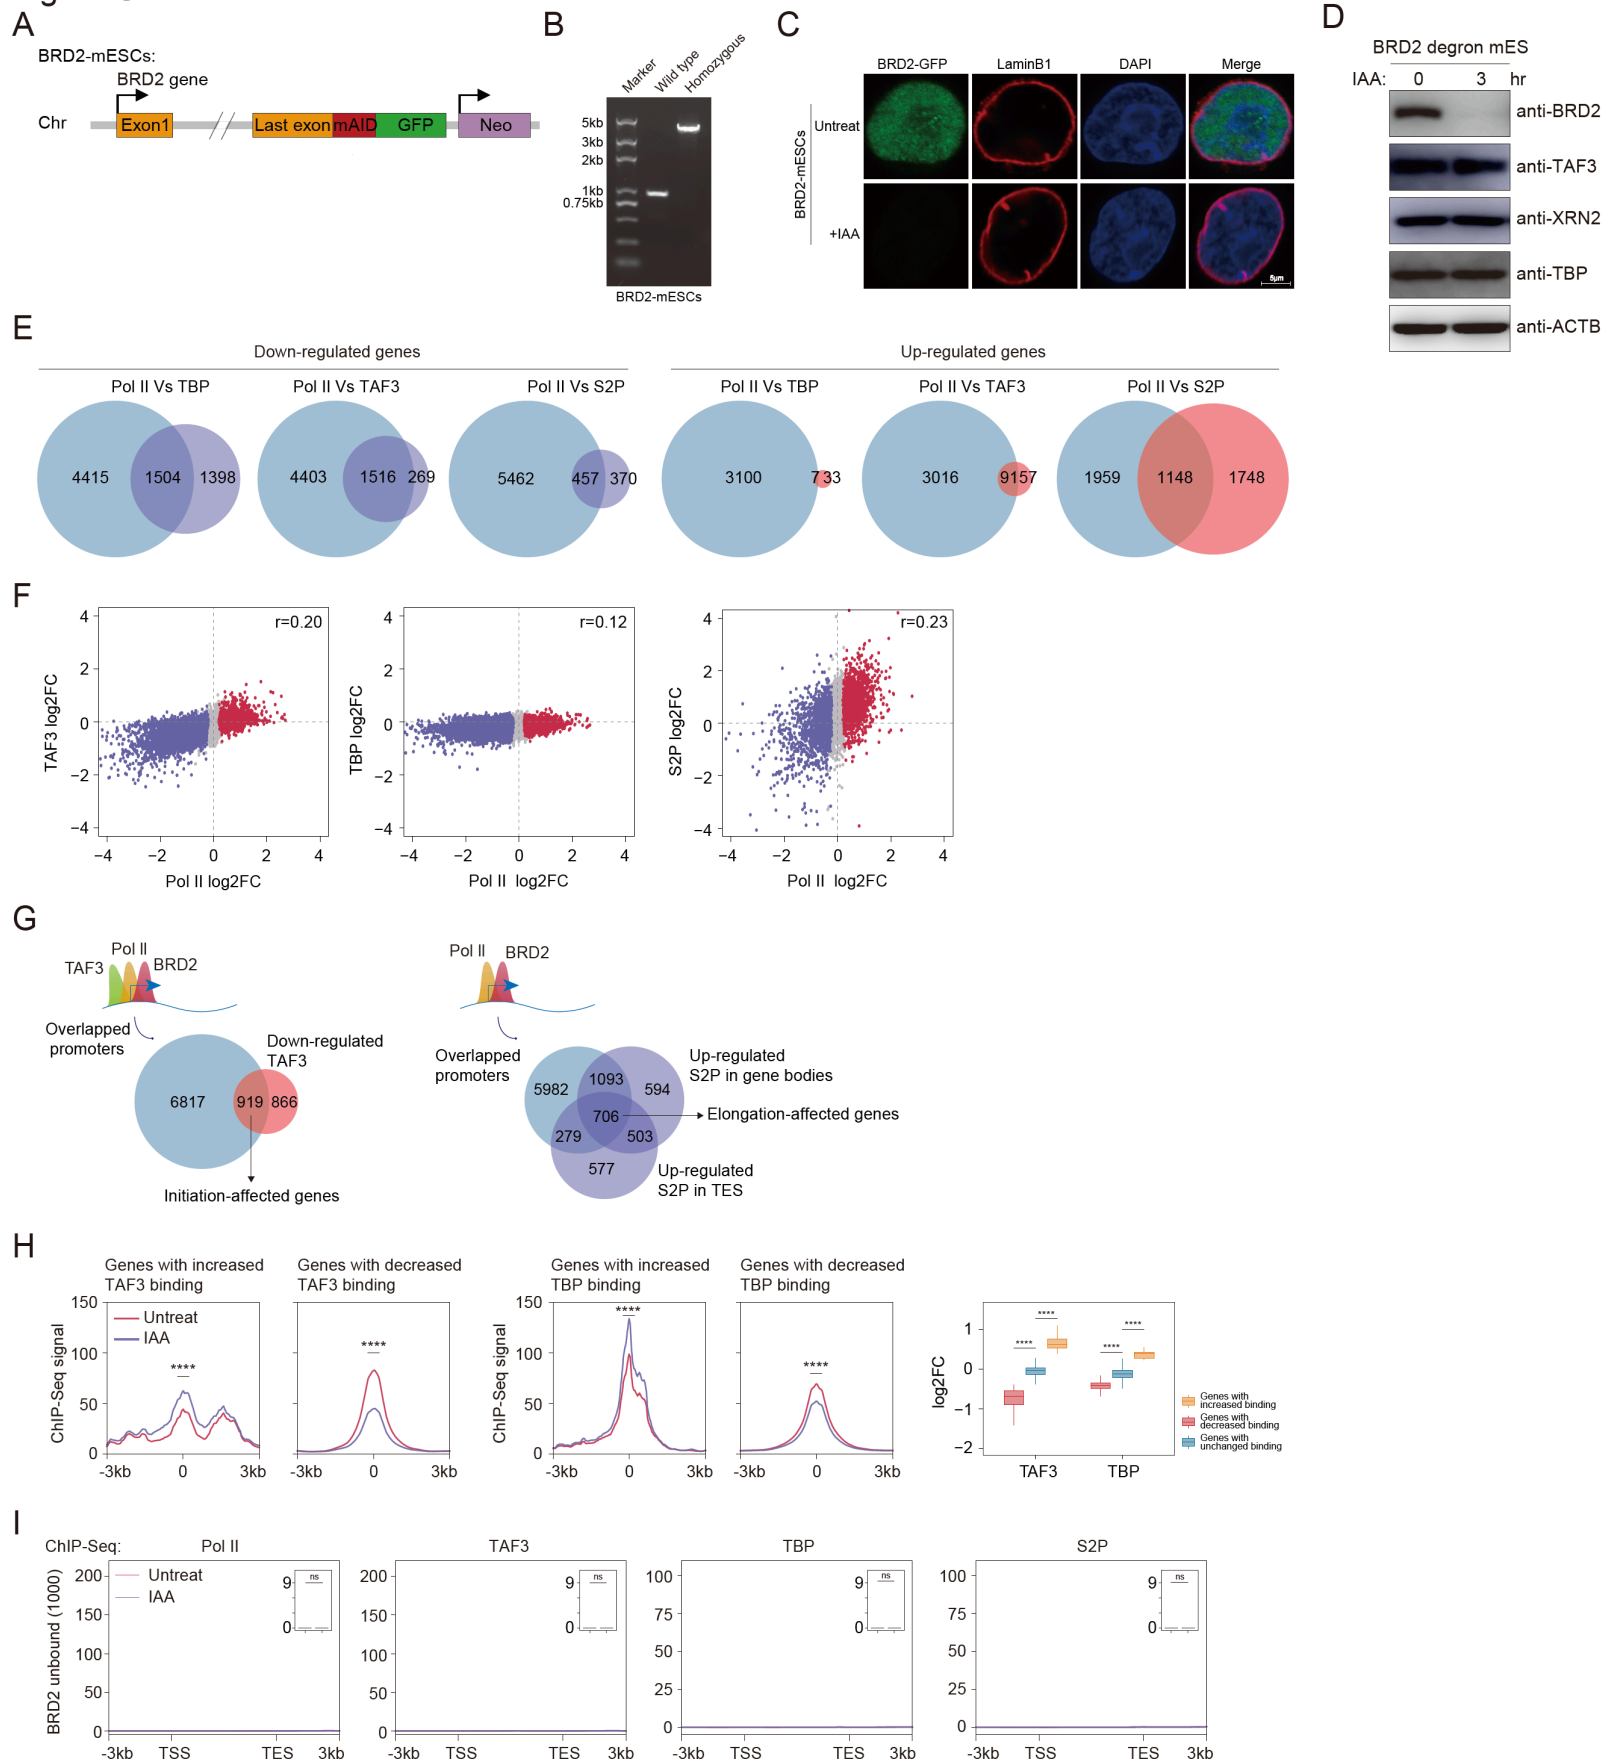

# Figure S2

A

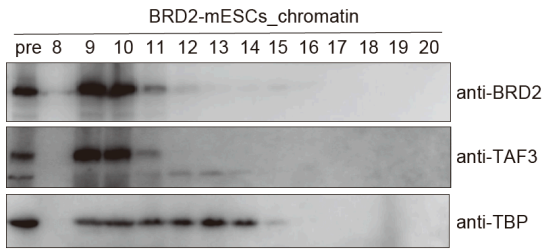

B

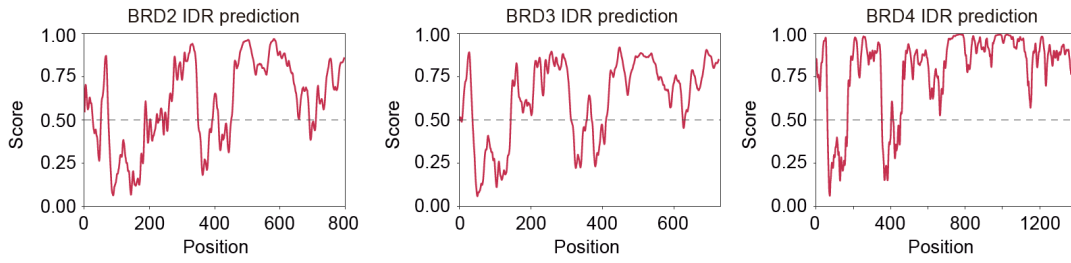

C

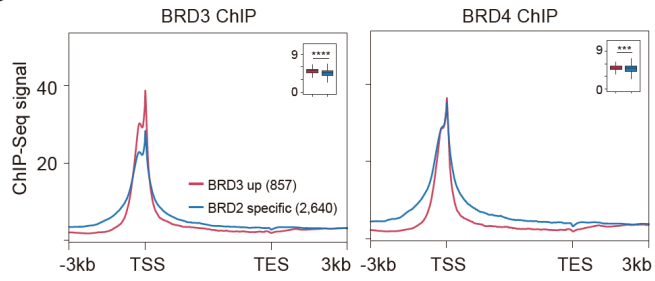

Figure S3

A

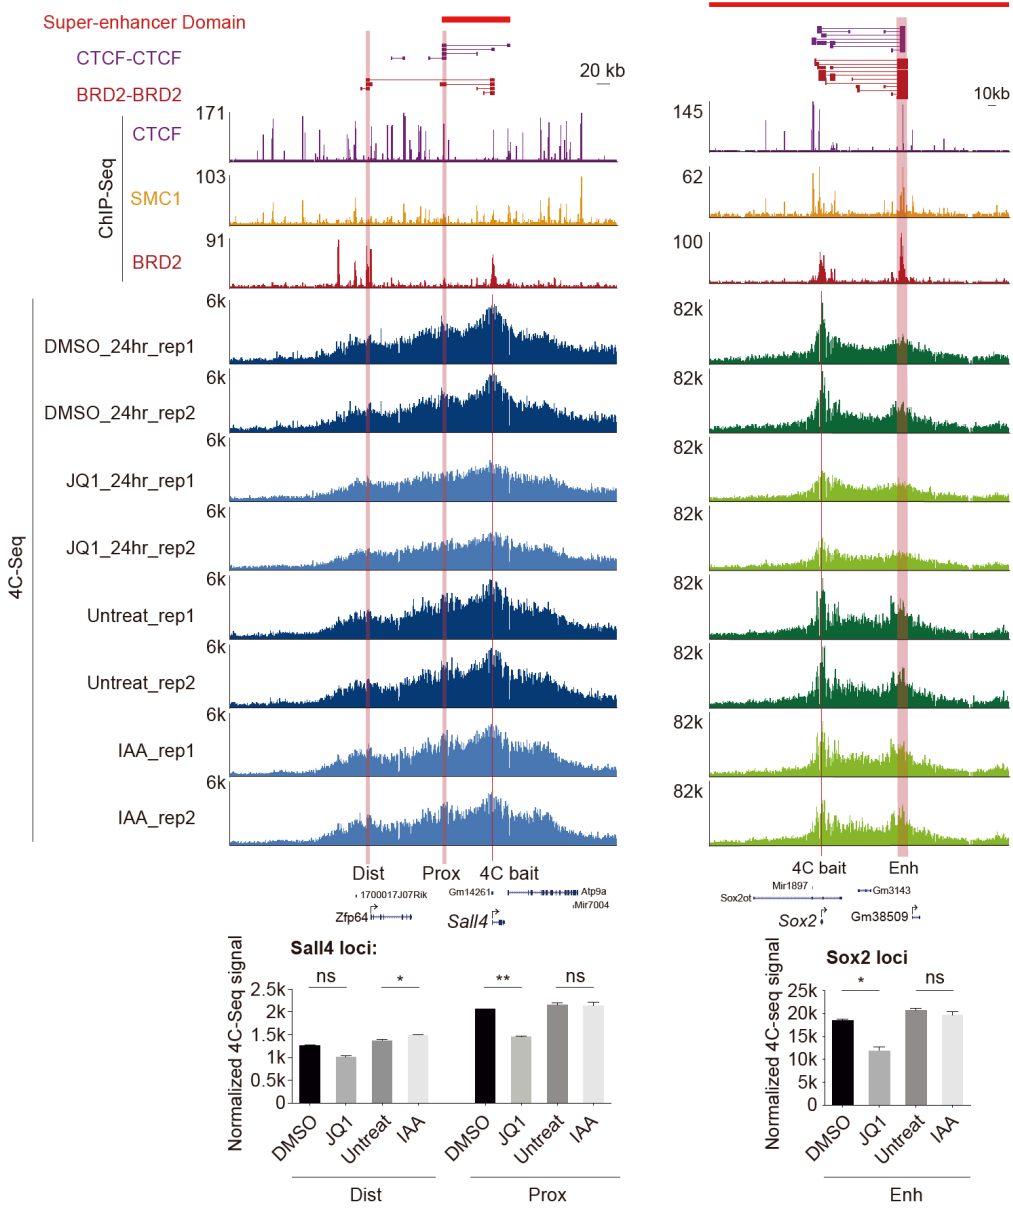

B

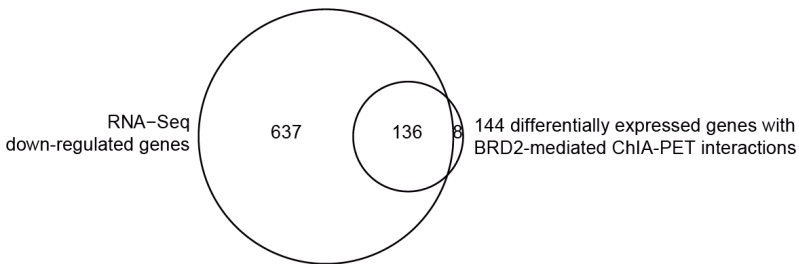

Figure S4

A

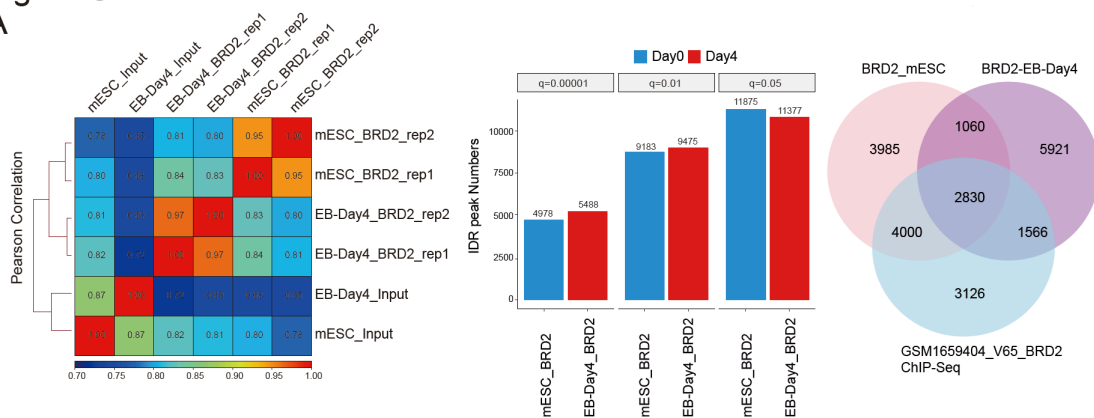

B

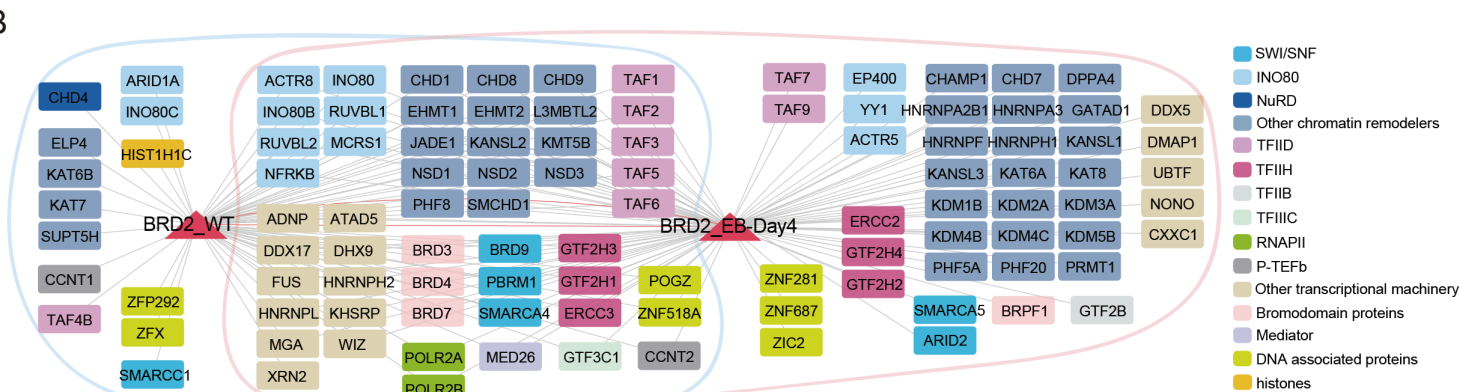

C

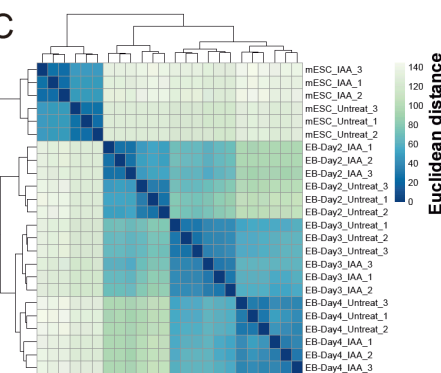

D

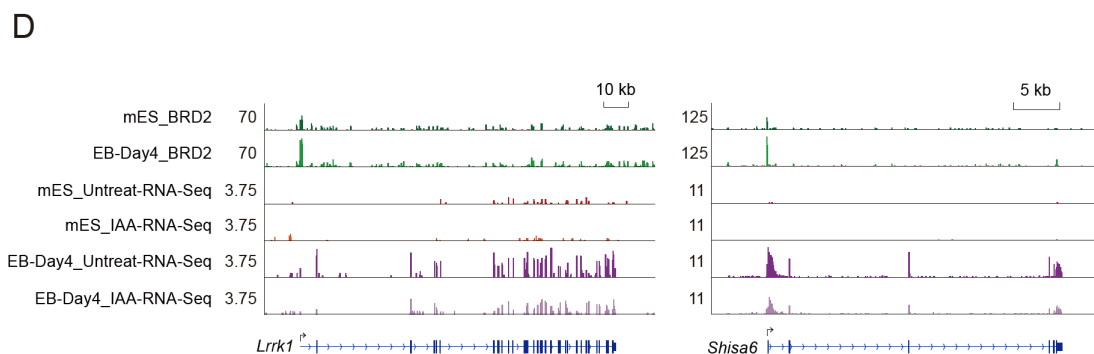

E

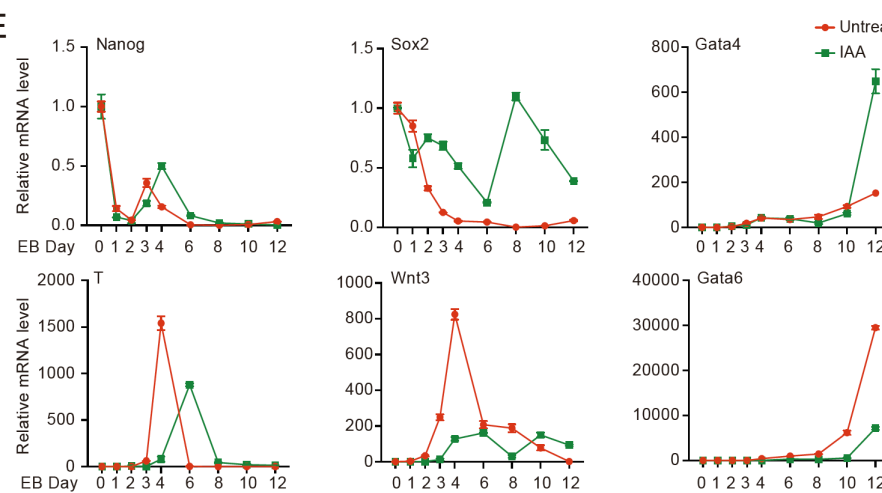

G

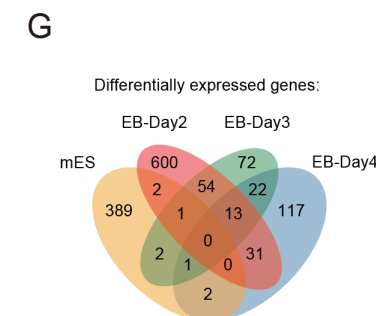

F

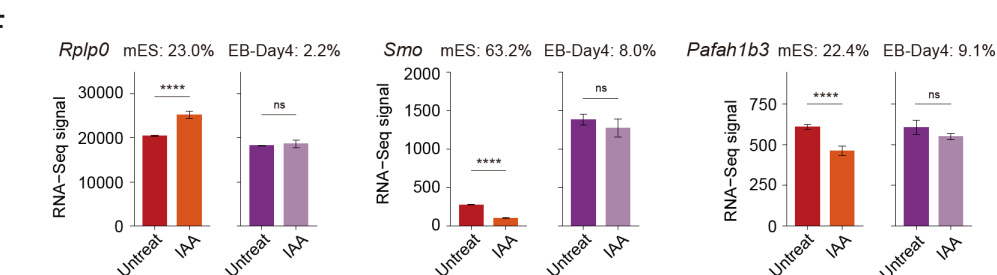

Figure S5

A

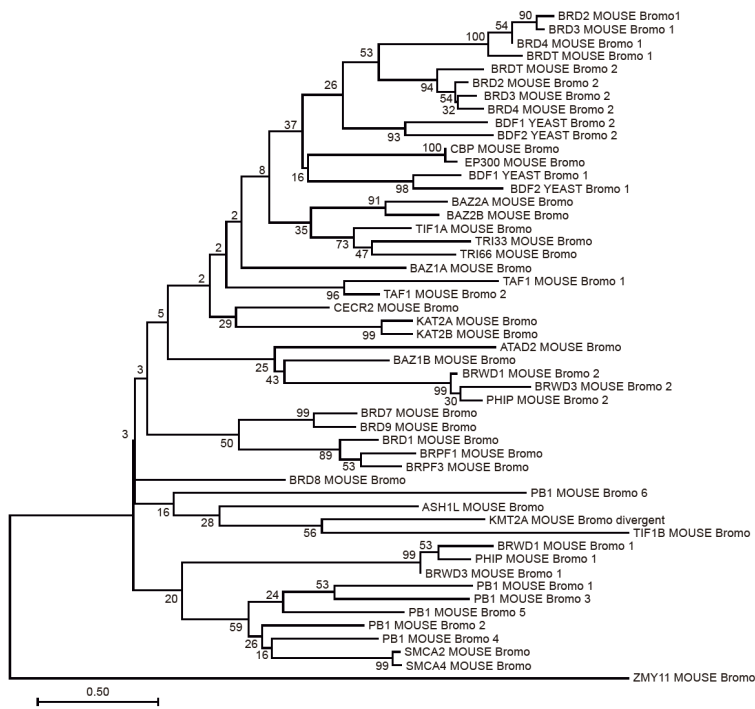

B

| Bromodomain 1:       |                                                                                                                            |
|----------------------|----------------------------------------------------------------------------------------------------------------------------|
| human BRD2           | 74 RVTNQLQYLHKVVMKALWKHQFAWPFQPVDAVKLGLPDYHKIIKQPMDMGTIKRRLENNYYWAASECMODFNTMFTNCYIYNKPTDDIVLMAQTLEKIFLQKVASMPQEEQ 185     |
| human BRD3           | 34 RKTNQLQYMQNVVVKTLWKHQFAWPFYQPVDAIKLNLPDYHKIIKQPMDMGTIKRRLENNYYWSASECMODFNTMFTNCYIYNKPTDDIVLMAQALEKIFLQKVAMPQEEV 145     |
| human BRD4           | 58 RQTNQLQYLLRVVLRKTLWKHQFAWPFQPVDAVKLNLPDYHKIIKQPMDMGTIKRRLENNYYWNAQECIQDFNTMFTNCYIYNKPGDDIVLMAEALEKIFLQKINELPTEET 169    |
| human BRDT           | 27 RLTNQLQYLQKVVLRDLWKHHSFSPFPQPVDAVKLQLPDYHTIKNPMDLNTIKRRLENNYYAKASECIEDFNTMFTNCYIYNKPGDDIVLMAQALEKIFLQKLSQMPQEEQ 138     |
| mouse Brd2           | 73 RVTNQLQYLHKVVMKALWKHQFAWPFQPVDAVKLGLPDYHKIIKQPMDMGTIKRRLENNYYWAASECMODFNTMFTNCYIYNKPTDDIVLMAQTLEKIFLQKVASMPQEEQ 184     |
| Chicken Brd2         | 27 RVTNQLQYLHKVVMKALWKHQFAWPFQPVDAVKLGLPDYHKIIKQPMDMGTIKRRLENNYYWGAASECMODFNTMFTNCYIYNKPTDDIVLMAQTLEKIFLQKVAMPQEEQ 138     |
| Xenopus Brd2         | 74 RSTNQLQYLHKAIVKSLWKHQFSWPFQPVDAVKLGLPDYHKIIKQPMDMGTIKRRLENNYYWSALECMODFNTMFTNCYIYNKPTDDIVLMAQSLKEMFLQKVAMPQEEQ 185      |
| Drosophila Fs(1)h    | 34 RNTNQLQYLKIVKVIWKHHSWPFQPVDAVKLNLPDYHKIIKQPMDMGTIKRRLENNYYWSAKETIQDFNTMFTNCYIYNKPGEDVVVMAQTLEKVFLOKIESMPKEEL 145        |
| Bromodomain 2:       |                                                                                                                            |
| human BRD2           | 345 KLSEQLKHCNGILKELLSKKHAAAYAWPFYKPVDSALGLHDYHDIIKHPMDLSTVRRKMNDRDYRDAQEFAADVRLMFSNCKYKYNPPDHDVVAMARKLQDVFFFRYAKMPDEE 457 |
| human BRD3           | 307 KLSEHLRYCDSLREMLSKKHAAAYAWPFYKPVDAEALGLHDYHDIIKHPMDLSTVRRKMDGREYDPAQGFADVRLMFSNCKYKYNPPDHEVVAMARKLQDVFFEMRFKMPDEE 419  |
| human BRD4           | 349 RVSEQLKCCSGILKEMFAKHAAYAWPFYKPVDEALGLHDYCDIHKHPMDMSTIKSKLEAREYRDAQEFGADVRLMFSNCKYKYNPPDHEVVAMARKLQDVFFEMRFKMPDEE 461   |
| human BRDT           | 268 KVTEQLRHCSLILKEMLAKKHFSYAWPFYKPVVNALGLHNYDVKVKNPMDLGTIKRKMNDQEKDAYKFAADVRLMFSNCKYKYNPPDHEVVAMARKLQDVFFTHFSKPIIEE 380   |
| mouse Brd2           | 344 KLSEQLKHCNGILKELLSKKHAAAYAWPFYKPVDSALGLHDYHDIIKHPMDLSTVRRKMNDRDYRDAQEFAADVRLMFSNCKYKYNPPDHDVVAMARKLQDVFFFRYAKMPDEE 456 |
| Chicken Brd2         | 292 KLSEQLKYCNGILKELLSKKHAAAYAWPFYKPVDSALGLHDYHDIIKHPMDLSTIKRKMNDREYHDAQEFAADVRLMFSNCKYKYNPPDHDVVAMARKLQDVFFFSYAKMPDEE 404 |
| Xenopus Brd2         | 339 KLSEQLKYCNGILKELLSKKHAAAYAWPFYKPVDSALGLHDYDIIKHPMDMSTIKKMDSREFKDAQEFAAAILMFSNCKYKYNPPDHDVVAMARKLQDVFFFSYAKMPDEE 451    |
| Drosophila Fs(1)h    | 476 KLSDALKSQNEILKELFSKHSYAWPFYKPVDAEMLGLHDYHDIIKHPMDLGTIKRKMNDREYKSAPEFAADVRLIETNCKYKYNPPDHDVVAMGRKLODVFFEMRYANIPDEE 588  |
| Dimerization domain: |                                                                                                                            |
| human BRD2           | 511 DSEEEAHRLAELQEQLRVHEQLAALSQGPISKPKRREKKEKKEKK 557                                                                      |
| human BRD3           | 454 DSEEEARLRLAELQEQLKAVHEQLAALSQAPVKNPKKREKKEKKEKK 500                                                                    |
| human BRD4           | 502 DSEEEARLRLAELQEQLKAVHEQLAALSQPQONPKKREKKEKKEKK 548                                                                     |
| human BRDT           | 414 DSEDERVKRLAKLQEQLKAVHQLQVLSQVPPFRKLNKREKKEKKEKK 460                                                                    |
| mouse Brd2           | 509 DSEEEAHRLAELQEQLRVHEQLAALSQGPISKPKRREKKEKKEKK 555                                                                      |
| Chicken Brd2         | 460 DSEEEANRLAELQEQLRVHEQLAALSQGPVSKPKRREKKEKKEKK 506                                                                      |
| Xenopus Brd2         | 491 DSEEEANRLAELQEQLRVHEQLAALSQGPISKPKRREKKEKKEKK 537                                                                      |
| Drosophila Fs(1)h    | 648 NSDEERSARLKMLESKLLGLQEEIRKLSSEASAKKAKKKEKKEKK 694                                                                      |
